# Supplementary figures and images for: Encapsulation of telmisartan inside insulinoma-cell-derived extracellular vesicles outperformed biomimetic nanovesicles in modulating the pancreatic inflammatory microenvironment
Source: Royal Society of Chemistry journal article supplement (doi:10.1039/d4tb00808a), 2024-01-01

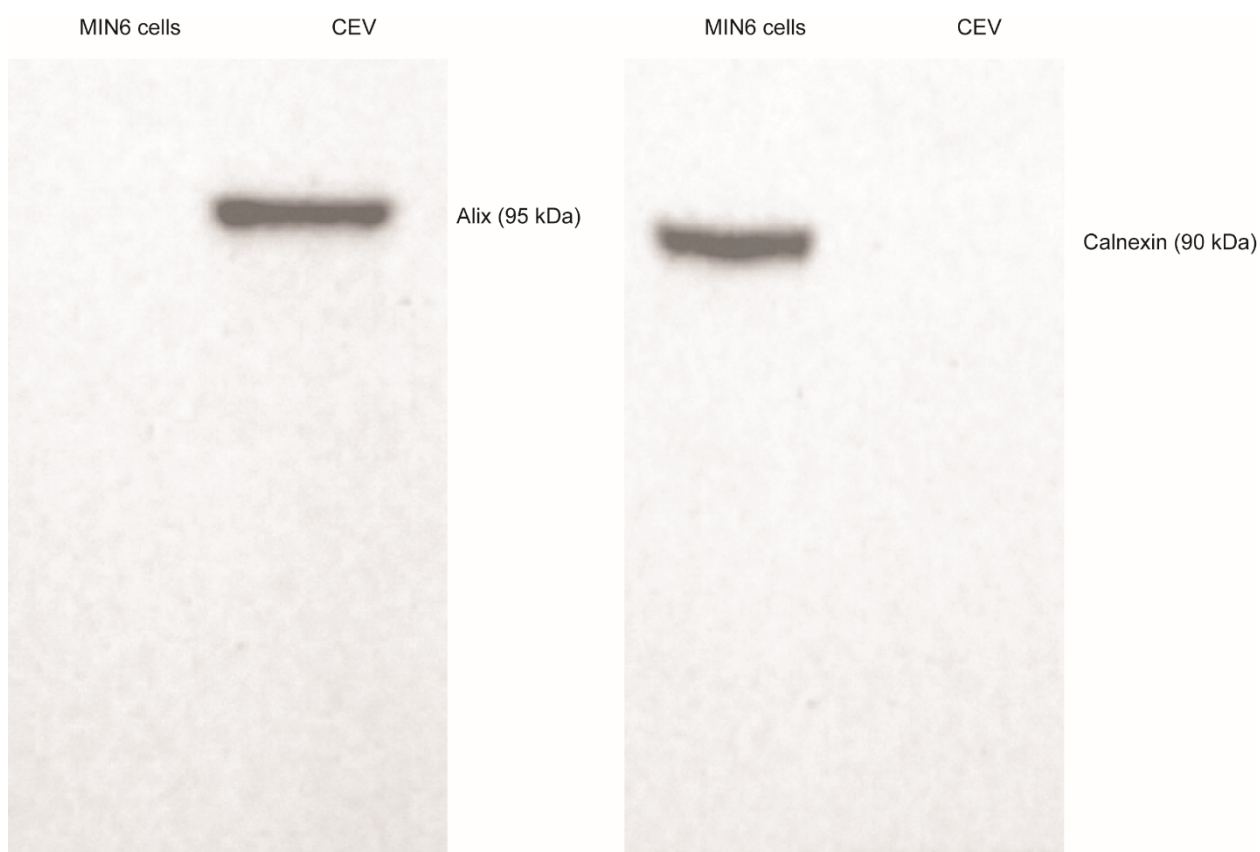

Figure 1B

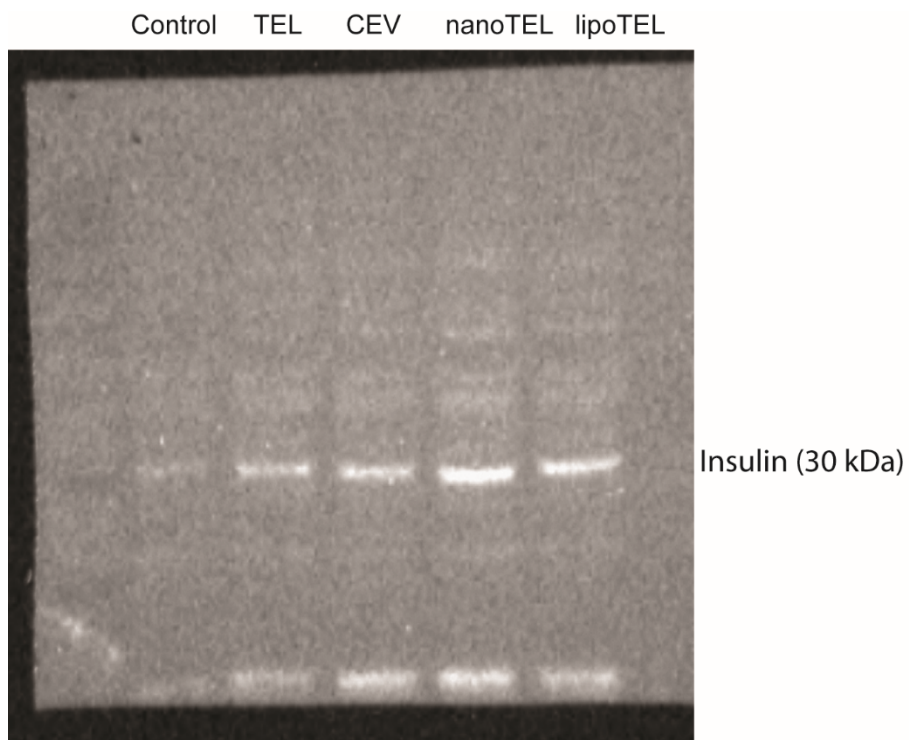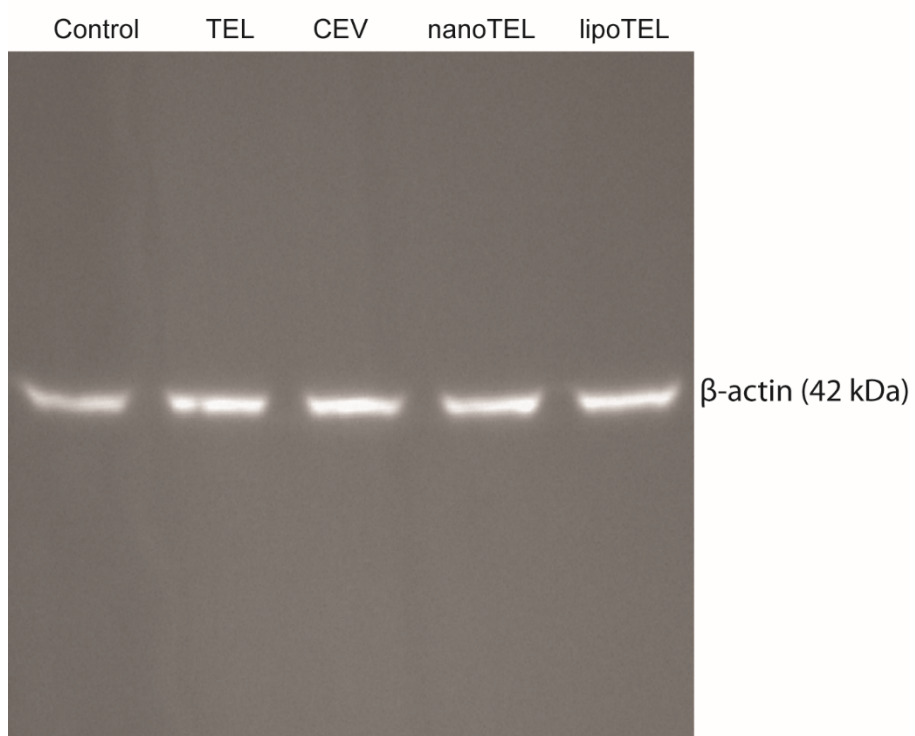

Figure 3F

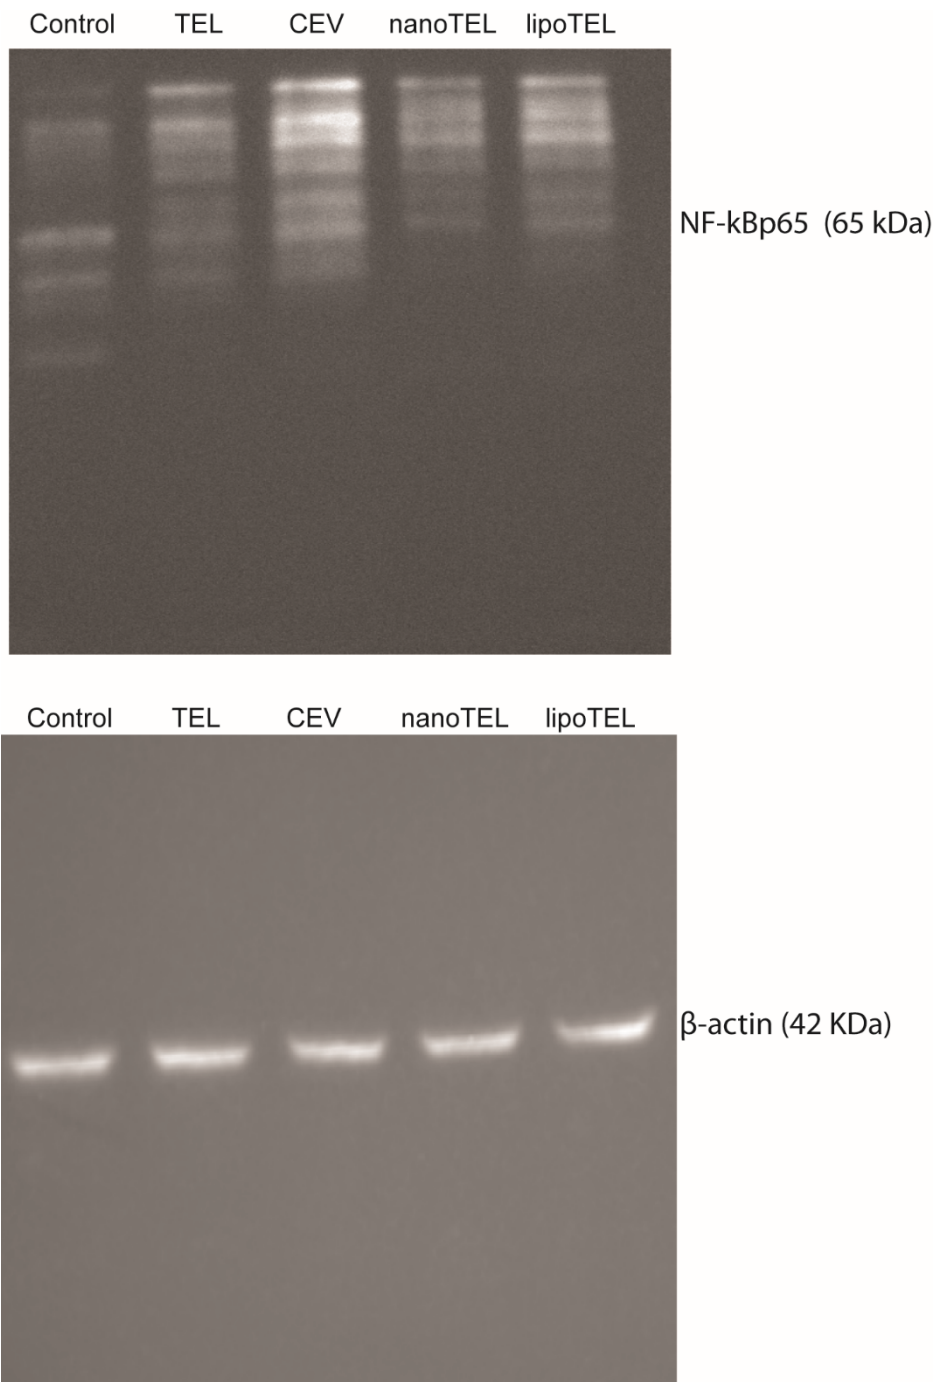

Figure 4B

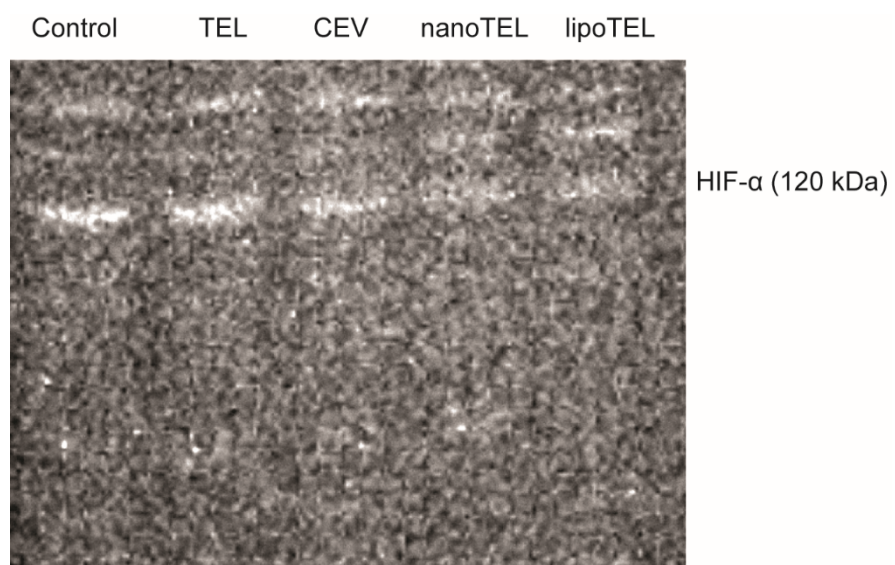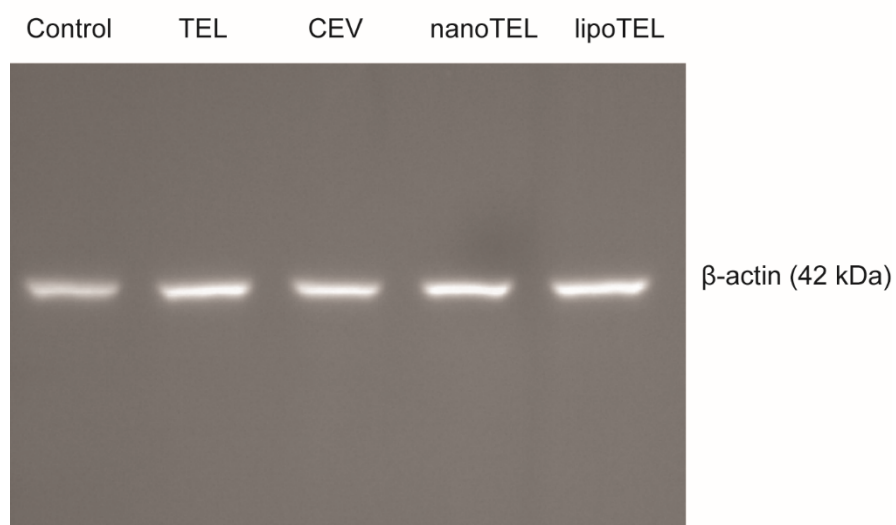

Figure 4C

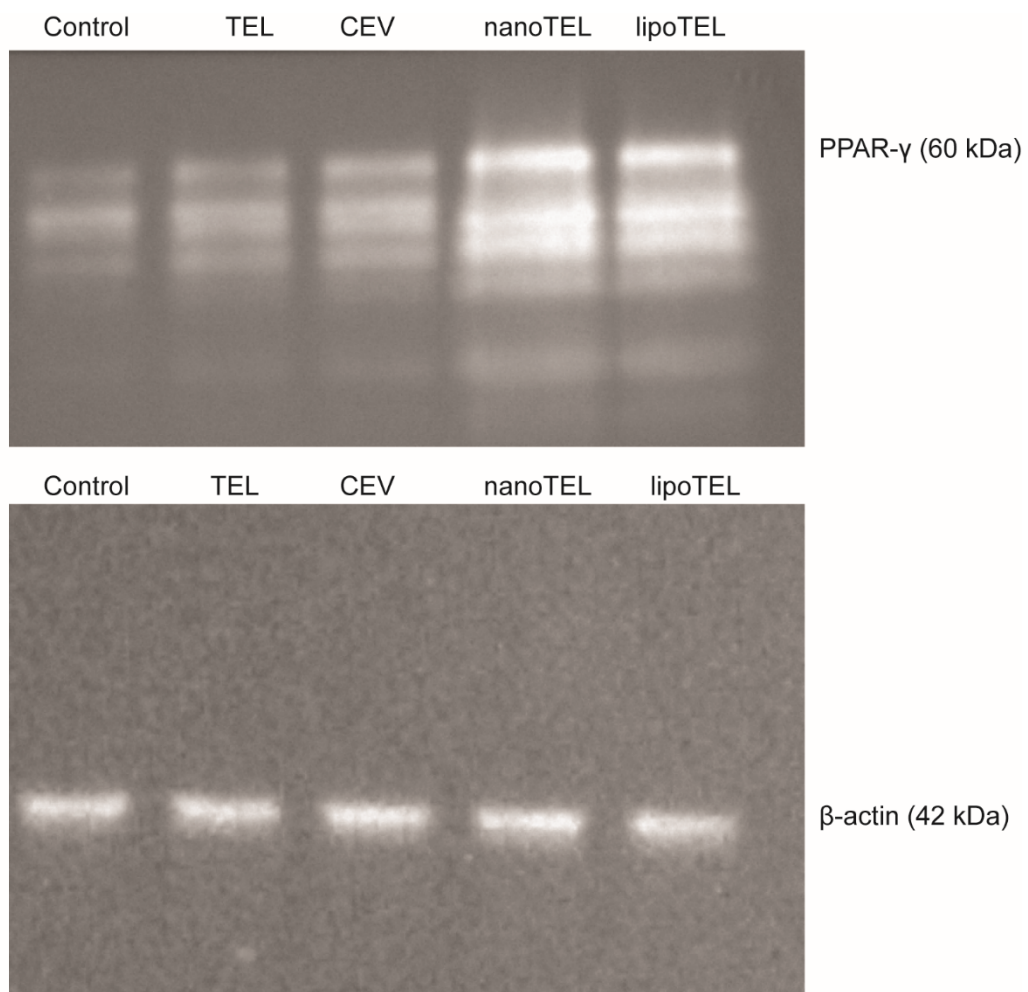

Figure 4D

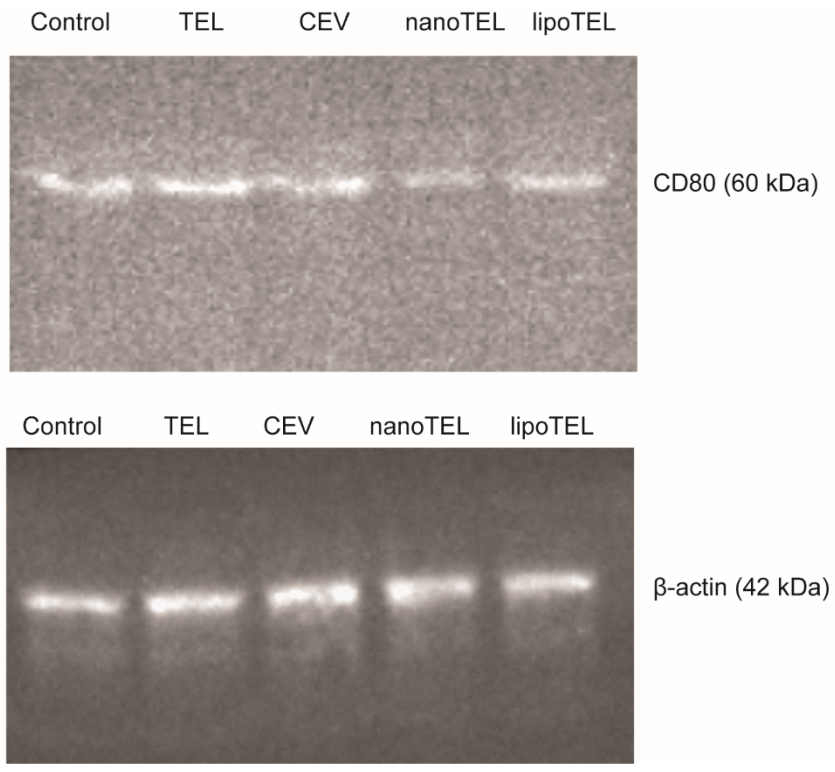

Figure 6C

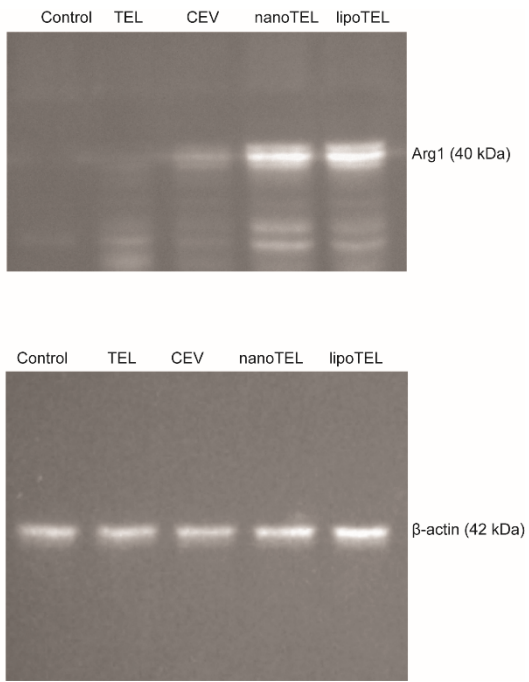

Figure 6D

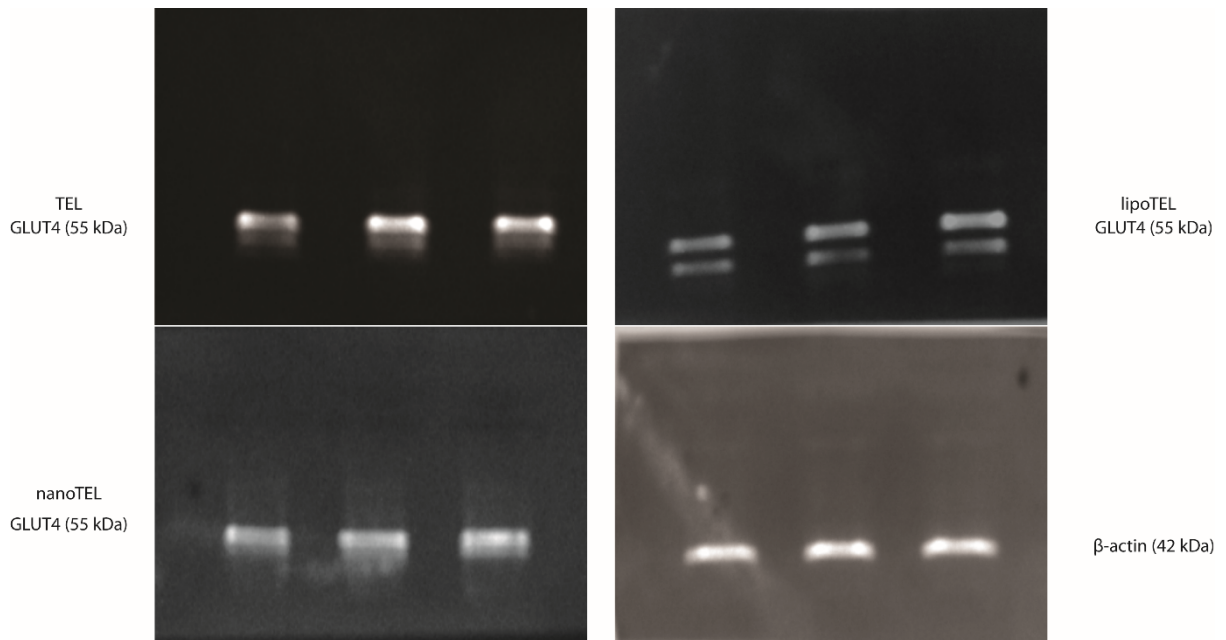

Figure S4D

Supplement: d4tb00808a1.pdf [file d4tb00808a1.pdf]
